1 **Title:** Reciprocal cybrids reveal how organellar genomes affect plant phenotypes

2

3 **Authors:**

4 Pádraic J. Flood<sup>1,2,3†</sup>, Tom P.J.M. Theeuwes<sup>1†</sup>, Korbinian Schneeberger<sup>3</sup>, Paul Keizer<sup>4</sup>, Willem  
5 Kruijer<sup>4</sup>, Edouard Severing<sup>3</sup>, Evangelos Kouklis<sup>1</sup>, Jos A. Hageman<sup>4</sup>, Raúl Wijffes<sup>5</sup>, Vanesa Calvo-  
6 Baltanas<sup>1</sup>, Frank F.M. Becker<sup>1</sup>, Sabine K. Schnabel<sup>4</sup>, Leo Willems<sup>6</sup>, Wilco Ligterink<sup>6</sup>, Jeroen van  
7 Arkel<sup>7</sup>, Roland Mumm<sup>7</sup>, José M. Gualberto<sup>8</sup>, Linda Savage<sup>9</sup>, David M. Kramer<sup>9</sup>, Joost J.B. Keurentjes<sup>1</sup>,  
8 Fred van Eeuwijk<sup>4</sup>, Maarten Koornneef<sup>1,3</sup>, Jeremy Harbinson<sup>2</sup>, Mark G.M. Aarts<sup>1</sup> & Erik Wijnker<sup>1†</sup>

9

10 **Affiliations:**

11 <sup>1</sup> Laboratory of Genetics, Wageningen University & Research, Wageningen, The Netherlands.

12 <sup>2</sup> Horticulture and Product Physiology, Wageningen University & Research, Wageningen, The  
13 Netherlands.

14 <sup>3</sup> Department of Plant Developmental Biology, Max Planck Institute for Plant Breeding Research,  
15 Cologne, Germany.

16 <sup>4</sup> Biometris, Wageningen University & Research, Wageningen, The Netherlands.

17 <sup>5</sup> Bioinformatics Group, Wageningen, The Netherlands

18 <sup>6</sup> Laboratory of Plant Physiology, Wageningen University & Research, Wageningen, The  
19 Netherlands.

20 <sup>7</sup> Bioscience, Wageningen University & Research, Wageningen, The Netherlands

21 <sup>8</sup> Institut de Biologie Moléculaire des Plantes, CNRS, Université de Strasbourg, Strasbourg, France.

22 <sup>9</sup> MSU-DOE Plant Research Lab, Michigan State University, East Lansing, USA

23 † These authors contributed equally to this work

24 \* Correspondence to:

25 P.J. Flood - [flood@mpipz.mpg.de](mailto:flood@mpipz.mpg.de)

26 T.P.J.M. Theeuwes - [tom.theeuwes@wur.nl](mailto:tom.theeuwes@wur.nl)

27 E. Wijnker - [erik.wijnker@wur.nl](mailto:erik.wijnker@wur.nl)

28

29

30

31 **Introductory paragraph:**

32 Assessing the impact of variation in chloroplast and mitochondrial DNA (collectively termed the  
33 plasmotype) on plant phenotypes is challenging due to the difficulty in separating their effect from  
34 nuclear derived variation (the nucleotype). Haploid inducer lines can be used as efficient plasmotype  
35 donors to generate new plasmotype-nucleotype combinations (cybrids)(Ravi et al., 2014). We generated  
36 a panel comprising all possible cybrids of seven *Arabidopsis thaliana* accessions and extensively  
37 phenotyped these lines for 1859 phenotypes under stable and fluctuating conditions. We show that  
38 natural variation in the plasmotype results in additive as well as epistatic effects across all phenotypic  
39 categories. Plasmotypes which induce more additive phenotypic changes also cause more significant  
40 epistatic effects, suggesting a possible common basis for both additive and epistatic effects. On average  
41 epistatic interactions explained twice as much of the variance in phenotypes as additive plasmotype  
42 effects. The impact of plasmotypic variation was also more pronounced under fluctuating and stressful  
43 environmental conditions. Thus, the phenotypic impact of variation in plasmotypes is the outcome of  
44 multilevel Nucleotype X Plasmotype X Environment interactions and, as such, the plasmotype is likely  
45 to serve as a reservoir of variation which is only exposed under certain conditions. The production of  
46 cybrids using haploid inducers is a quick and precise method for assessing the phenotypic effects of  
47 natural variation in organellar genomes. It will facilitate efficient screening of unique nucleotype-  
48 plasmotype combinations to both improve our understanding of natural variation in nucleotype  
49 plasmotype interactions and identify favourable combinations to improve plant performance.

50 Chloroplasts and mitochondria play essential roles in metabolism, cellular homeostasis and  
51 environmental sensing (Petrillo et al., 2014; Chan et al., 2016). Their genomes contain only a limited set  
52 of genes whose functioning requires tight coordination with the nucleus through signaling pathways that  
53 modulate nuclear and organellar gene expression (Petrillo et al., 2014; Kleine and Leister, 2016).  
54 Plasmotype variation can be strongly additive, such as in the case of chloroplast encoded herbicide  
55 tolerance (Flood et al., 2016), or can manifest in complex cytonuclear interactions as non-additive, non-  
56 linear effects (epistasis), such as found for secondary metabolites (Joseph et al., 2013). The phenotypic  
57 consequences of epistasis can be detected when a plasmotype causes phenotypic effects in  
58 combination with some, but not all nuclear backgrounds. Recent studies suggest that cytonuclear  
59 epistasis is the main route through which variation in the plasmotype is expressed (Zeyl et al., 2005;

60 Montooth et al., 2010; Joseph et al., 2013; Joseph et al., 2013; Tang et al., 2014; Roux et al., 2016;  
61 Mossman et al., 2019) and that additive effects are both rare and of small effect.

62 Plasmotypic variation is relevant from an agricultural as well as evolutionary perspective  
63 (Levings, 1990; Bock et al., 2014; Dobler et al., 2014), but to understand or utilize it, it is necessary to  
64 separate nuclear from mitochondrial and chloroplastic effects. Reciprocal-cross designs, where  
65 nucleotypes segregate in different plasmotypic backgrounds, have been used to identify plasmotype-  
66 specific quantitative trait loci (Joseph et al., 2013; Tang et al., 2014), but are limited to just two  
67 plasmotypes. A larger number of plasmotypes can be studied using backcross designs where  
68 plasmotypes are introgressed into different nuclear backgrounds (Dowling et al., 2007; Sambatti et al.,  
69 2008; Miclaus et al., 2016; Roux et al., 2016), but backcross approaches are lengthy and any undetected  
70 nuclear introgressions may confound the results.

71 To precisely and rapidly address the contribution of organellar variation to plant phenotypes, we  
72 explored the use of a haploid inducer line available in *Arabidopsis* (*GFP-tailswap*) (Ravi and Chan, 2010;  
73 Ravi et al., 2014). When pollinated with a wild-type plant, the *GFP-tailswap* nuclear genome is lost from  
74 the zygote through uniparental genome elimination. This generates haploid cybrid offspring with a  
75 paternally derived nuclear genome and maternally (*GFP-tailswap*) derived mitochondria and  
76 chloroplasts (Fig. 1). These haploid plants produce stable diploid (doubled haploid) offspring following  
77 genome duplication or restitutional meiosis (Ravi and Chan, 2010). We set out to test the use of this  
78 approach to investigate how plasmotypic variation affects plant phenotypes and to what extent this  
79 variation manifests itself as additive variation or as cytonuclear epistasis.

80 Seven different *Arabidopsis* accessions were selected for our experiment: six that represent a  
81 snapshot of natural variation (Bur, C24, Col-0, Ler-0, Sha, WS-4) and Ely, an accession with a large-  
82 effect mutation in the chloroplast-encoded *PsbA* gene (El-Lithy et al., 2005). This mutation results in  
83 reduced photosystem II efficiency (El-Lithy et al., 2005; Flood et al., 2014) and was included to evaluate  
84 the consequence of a strong plasmotype effect in our test-panel. We first generated haploid inducers  
85 for all seven plasmotypes (Fig. 1A) and then used each inducer to generate cybrid offspring for all seven  
86 nucleotypes (Fig. 1 B and C). Cybrid genotypes will henceforth be denoted as nucleotype<sup>plasmotype</sup> (i.e.  
87 Ely<sup>Bur</sup> denotes a cybrid with Ely nucleus and Bur plasmotype). Wild-type nucleotype-plasmotype  
88 combinations were also regenerated in this way (hereafter referred to as self-cybrids; i.e. Bur<sup>Bur</sup>, C24<sup>C24</sup>,  
89 etc.) to later compare these with their wild-type progenitors. The genotypes of all haploid cybrids were

90 verified by resequencing. This led to the exclusion of Bur<sup>C24</sup> and Bur<sup>Bur</sup>, because of the identification of  
 91 a nucleotypic *de-novo* duplication of 200kb in these two lines, likely derived from a spontaneous  
 92 duplication in a Bur wild-type progenitor used in creating these cybrids (see Online methods;  
 93 Supplementary Fig. 1 to 4). With the exception of Ely<sup>Sha</sup> for which we obtained seeds at a later stage,  
 94 we obtained doubled haploid seeds from all haploid cybrids resulting in a testpanel of 46 cybrids and 7  
 95 wildtype progenitors. As with Ely<sup>Sha</sup>, Bur<sup>C24</sup> and Bur<sup>Bur</sup> were subsequently recreated, and the complete  
 96 panel will be submitted to NASC. To visualize the genetic variation between lines within our panel we  
 97 generated neighbor joining trees for the nuclear, mitochondrial and chloroplast genomes  
 98 (Supplementary Fig. 5). The nucleotypes were found to be approximately equidistant, while the Ler, Ely  
 99 and Col plasmotypes appear to be more closely related to each other than the other plasmotypes.

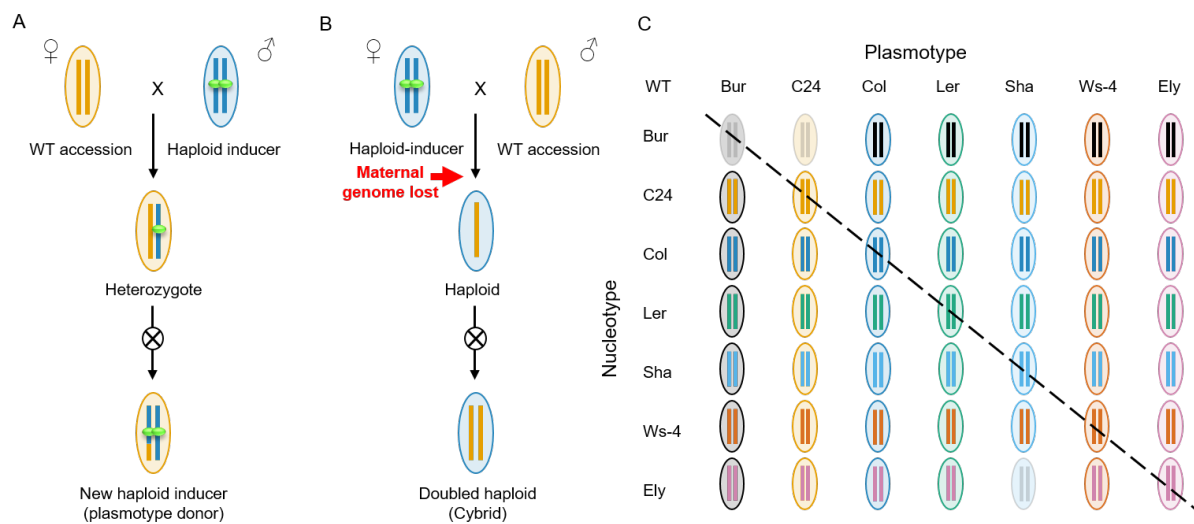

100

101 **Figure 1. Generation of a cybrid test panel.** A) Generation of a new haploid inducer (HI) line with a  
 102 new plasmotype. The HI expresses a GFP-tagged *CENH3/HRT12* in a *cenh3/htr12* mutant background.  
 103 A cross of a wild type (female) with a HI (male) results in a hybrid F1. A diploid F1 is selected in which  
 104 no genome elimination has occurred. Self-fertilization generates an F2 population in the plasmotype of  
 105 the wild-type mother. From this an F2 plant is selected that is homozygous for the *cenh3/htr12* mutation  
 106 and carries the *GFP-tailswap* transgene. This F2 plant is a new HI line and can serve as plasmotype  
 107 donor when used as female in crosses. Vertical bars represent the nucleotype, and the ovals represent  
 108 the plasmotype. HI centromeres are indicated in green (signifying GFP-tagged CENH3/HTR12 proteins  
 109 as encoded by the *GFP-tailswap* construct) that cause uniparental genome-elimination. B) HI lines can  
 110 function as plasmotype donors when used as a female parent. In this case, uniparental genome  
 111 elimination (red arrow) leads to a haploid offspring plant with the nucleotype of the wild-type (WT) male

112 parent, but the plasmotype of the HI mother. C) Full diallel of all nucleotype-plasmotype combinations  
113 for which cybrids were generated. The diagonal line highlights the wild-type (WT) nucleotype-  
114 plasmotype combinations that were generated by crossing wild-type plants to plasmotype donors with  
115 the plasmotype of the wild type (self-cybrids). Bur<sup>Bur</sup>, Bur<sup>C24</sup> and Ely<sup>Sha</sup> are faded out, as they were not  
116 included in the phenotyping experiments, they have been subsequently recreated and the complete set  
117 has been submitted to NASC.

118

119 We phenotyped the cybrid panel under constant environmental conditions for absolute and  
120 relative growth rate, biomass accumulation, epinastic leaf movement, photosystem II efficiency ( $\Phi_{PSII}$ ),  
121 non-photochemical quenching (NPQ), and elements thereof ( $\Phi_{NO}$ ,  $\Phi_{NPQ}$ ,  $q_E$  and  $q_I$ ), a reflectance-based  
122 estimate of chlorophyll, flowering time, germination, pollen abortion, and primary metabolites. To  
123 simulate more variable conditions that are frequently encountered in the field, we also screened the  
124 panel under fluctuating light for all the above-mentioned photosynthesis-related phenotypes and  
125 assayed germination rates under osmotic stress and after a controlled deterioration treatment. Counting  
126 individual metabolite concentrations and single time points in the time series separately, we collected in  
127 total 1859 phenotypes (Supplementary Data 1, Supplementary Table 4). To avoid overrepresentation of  
128 highly correlated and non-informative phenotypes we selected a subset of 92 phenotypes (Online  
129 methods, Supplementary Table 2) comprising 24 from constant growth conditions, 32 from fluctuating  
130 or challenging environmental conditions and 36 primary metabolites for further analysis (Supplementary  
131 Fig. 6, Supplementary Table 2).

132 Comparison of six self-cybrids with their genetically identical wild-type progenitors for these 92  
133 phenotypes did not reveal significant phenotypic differences (Supplementary Table 1) from which we  
134 infer that uniparental genome elimination is a robust method to generate cybrids. To determine the  
135 relative contributions of nucleotype, plasmotype, and their interaction to the observed phenotypic  
136 variation, we estimated the fraction of the broad sense heritability ( $H^2$ ; also called repeatability (Falconer  
137 and Mackay, 1996)) explained by each. Across the entire panel the average contribution to  $H^2$  of  
138 nucleotype, plasmotype and nucleotype-plasmotype interaction was 65.9%, 28.0% and 6.1%  
139 respectively (Supplementary Table 2 and 3; Supplementary Data 2). Most of the plasmotype derived  
140 additive variation was caused by the Ely plasmotype, arising from the *psbA* mutation. When this  
141 plasmotype was excluded from the analysis, the nucleotype, plasmotype and their interaction account

142 for 91.9%, 2.9% and 5.2% of the genetic variation, respectively (Supplementary Table 2 and 3;  
143 Supplementary Data 2). So, while nucleotide-derived additive variation is the main genetic determinant  
144 of the cybrid phenotype, variation caused by plasmotype additive effects as well as epistatic effects  
145 results in substantial phenotypic differences.

146         Next we sought to assess whether there are general patterns in how specific nucleotypes and  
147 plasmotypes interact. To this end we first assessed which plasmotype changes result in additive  
148 phenotypic changes. Plasmotype replacements involving the Ely plasmotype lead to additive changes  
149 in, on average, 50 (out of 92) phenotypes across the 7 nucleotypes (Table 1A). Changes involving the  
150 Bur plasmotype lead to on average 10 significant additive effects, 8 of which are photosynthesis-related  
151 (Supplementary Data 2). Other plasmotype changes show on average one additive effect, in  
152 predominantly non-photosynthetic phenotypes. Comparison of wild-type cytonuclear combinations with  
153 all their iso-nuclear cybrid lines also shows that plasmotype changes involving Ely and Bur plasmotypes  
154 show the most epistatic effects (on average 43 and 6 respectively) (Table 1B). The number of epistatic  
155 effects resulting from the Bur plasmotype range between 0 ( $Ler^{Ler}$  vs  $Ler^{Bur}$ ) to 10 ( $Sha^{Sha}$  vs  $Sha^{Bur}$ ),  
156 indicating high variability. Plasmotype changes involving other plasmotypes show more modest  
157 numbers of significant epistatic effects that range from 0 to 6. Plasmotypes that result in more additive  
158 effects also cause more epistatic effects (Pearson correlation coefficient of 0.99, p-value  $1.3e-5$ )  
159 suggesting a possible common cause (Supplementary Fig. 7).

160

161 **Table 1. Significant plasmotype induced effects in 92 phenotypes.** A) Number of observed  
 162 significant plasmotype additive effects when a specific plasmotype is changed for another plasmotype,  
 163 regardless of the nucleotype. Note that the replacement of Bur (top row) and Ely plasmotypes (last  
 164 column) result in most plasmotype additive effects. B) Number of observed significant epistatic effects  
 165 in phenotypes between wild-type nucleotype-plasmotype combinations and cybrids with different  
 166 plasmotypes. Rows indicate the number of significant effects when comparing self-cybrids to cybrids  
 167 with identical nucleotype but non-native plasmotype. Columns indicate specific plasmotype changes.  
 168 Note that changing the Ely plasmotype for another plasmotype (bottom row and last column) results in  
 169 many epistatic effects due to the large-effect mutation in the chloroplast-encoded *PsbA* gene of the Ely  
 170 plasmotype. Similar effects, but of smaller magnitude, result from changing the Bur plasmotype (top row  
 171 and first column). Posthoc tests were used with Hochberg's p-value correction for panel A and Dunnett's  
 172 p-value correction (with the wild-type as control) for panel B,  $\alpha = 0.05$ . nd = not determined. For  
 173 underlying p-values and phenotypes see Supplementary Data 2. Yellow cells indicate low number of  
 174 significant effects; blue cells show higher number of significant effects.

|            |                     | Plasmotype         |                    |                    |                    |                    |                     |                    |
|------------|---------------------|--------------------|--------------------|--------------------|--------------------|--------------------|---------------------|--------------------|
|            |                     | XXX <sup>Bur</sup> | XXX <sup>C24</sup> | XXX <sup>Col</sup> | XXX <sup>Ler</sup> | XXX <sup>Sha</sup> | XXX <sup>Ws-4</sup> | XXX <sup>Ely</sup> |
| Plasmotype | XXX <sup>Bur</sup>  |                    | 12                 | 15                 | 10                 | 15                 | 6                   | 55                 |
|            | XXX <sup>C24</sup>  |                    |                    | 1                  | 0                  | 1                  | 0                   | 50                 |
|            | XXX <sup>Col</sup>  |                    |                    |                    | 2                  | 2                  | 1                   | 50                 |
|            | XXX <sup>Ler</sup>  |                    |                    |                    |                    | 0                  | 1                   | 48                 |
|            | XXX <sup>Sha</sup>  |                    |                    |                    |                    |                    | 2                   | 49                 |
|            | XXX <sup>Ws-4</sup> |                    |                    |                    |                    |                    |                     | 49                 |
|            | XXX <sup>Ely</sup>  |                    |                    |                    |                    |                    |                     |                    |

175

|                                            |                      | Plasmotype         |                    |                    |                    |                    |                     |                    |
|--------------------------------------------|----------------------|--------------------|--------------------|--------------------|--------------------|--------------------|---------------------|--------------------|
|                                            |                      | XXX <sup>Bur</sup> | XXX <sup>C24</sup> | XXX <sup>Col</sup> | XXX <sup>Ler</sup> | XXX <sup>Sha</sup> | XXX <sup>Ws-4</sup> | XXX <sup>Ely</sup> |
| wildtype nucleotype-plasmotype combination | Bur wildtype         |                    | nd                 | 4                  | 7                  | 9                  | 4                   | 48                 |
|                                            | C24 <sup>C24</sup>   | 4                  |                    | 1                  | 0                  | 3                  | 1                   | 32                 |
|                                            | Col <sup>Col</sup>   | 5                  | 2                  |                    | 0                  | 1                  | 1                   | 39                 |
|                                            | Ler <sup>Ler</sup>   | 0                  | 0                  | 1                  |                    | 3                  | 6                   | 37                 |
|                                            | Sha <sup>Sha</sup>   | 10                 | 2                  | 1                  | 1                  |                    | 2                   | 40                 |
|                                            | Ws-4 <sup>Ws-4</sup> | 4                  | 3                  | 0                  | 0                  | 4                  |                     | 37                 |
|                                            | Ely <sup>Ely</sup>   | 41                 | 45                 | 44                 | 42                 | nd                 | 42                  |                    |

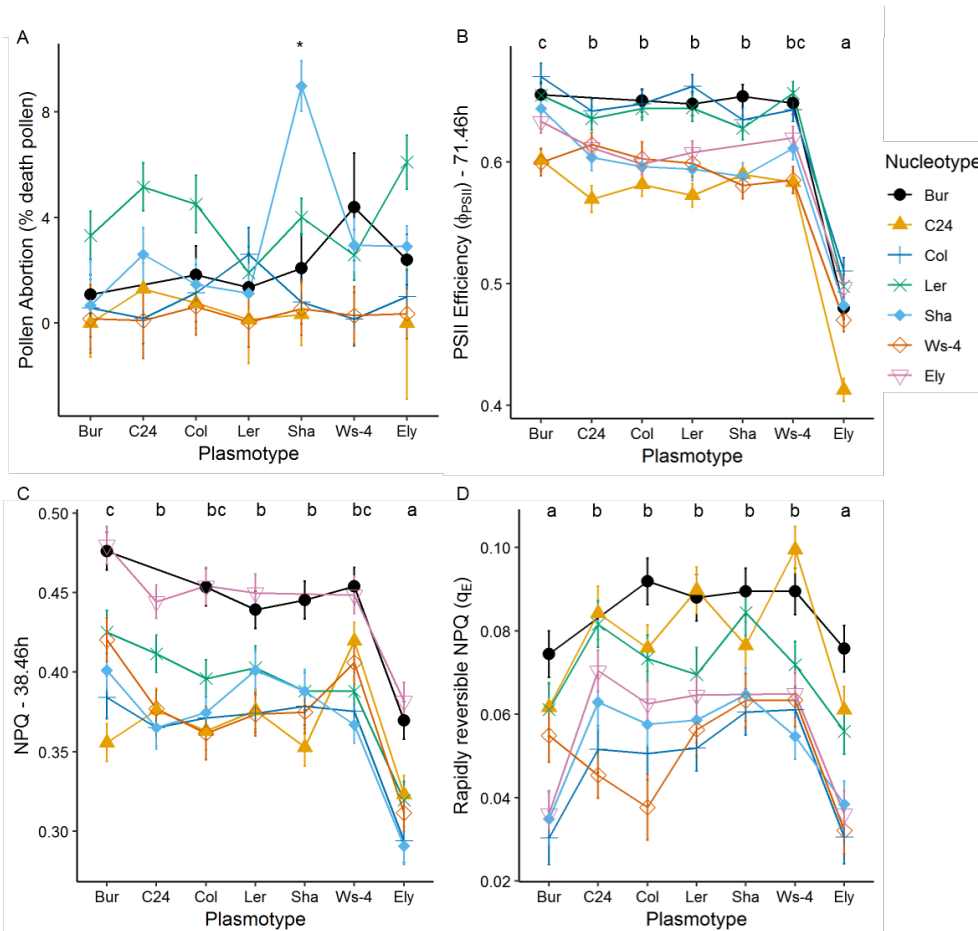

176

177 **Figure 2. Plasmotype changes result in cytonuclear epistasis, and in the case of cybrids with the**

178 **Ely and Bur plasmotype also in additive effects.** A) Pollen abortion, percentage of dead pollen out

179 of 250. B) PSII efficiency ( $\Phi_{PSII}$ ) 71.46 hours after start of experiment, after a full day of fluctuating light

180 with a maximum difference between 500 and 100  $\mu\text{mol}/\text{m}^2/\text{s}$  irradiance (see Fig. 3C for light treatment).

181 C) NPQ at 38.46 hours after start of experiment, which is at 300  $\mu\text{mol}/\text{m}^2/\text{s}$  on a sigmoidal light curve

182 starting at 65  $\mu\text{mol}/\text{m}^2/\text{s}$ . D) The rapidly reversible component of NPQ,  $q_E$ , at 259  $\mu\text{mol}/\text{m}^2/\text{s}$  after a full

183 day of fluctuating light with a maximum difference between 500 and 100  $\mu\text{mol}/\text{m}^2/\text{s}$ . X-axis are labelled

184 with the plasmotype, and the colours represent the nucleotypes. Any deviation from a horizontal line

185 represents a potential additive or epistatic effect. Error bars represent the standard error of the mean.

186 The \* in panel A indicates a unique significant difference between the Sha<sup>Sha</sup> cybrid and other cybrids

187 with Sha nucleotypes (epistasis) (Hochberg's test,  $n=4-10$ ). The letters above panels B, C and D

188 represent significant differences between plasmotypes regardless of the nucleotype (additivity)

189 (Hochberg's test,  $n=4*7$ ). For panels B, C and D plants were grown at 200  $\mu\text{mol}/\text{m}^2/\text{s}$  for 21 days prior

190 to starting the experiment.



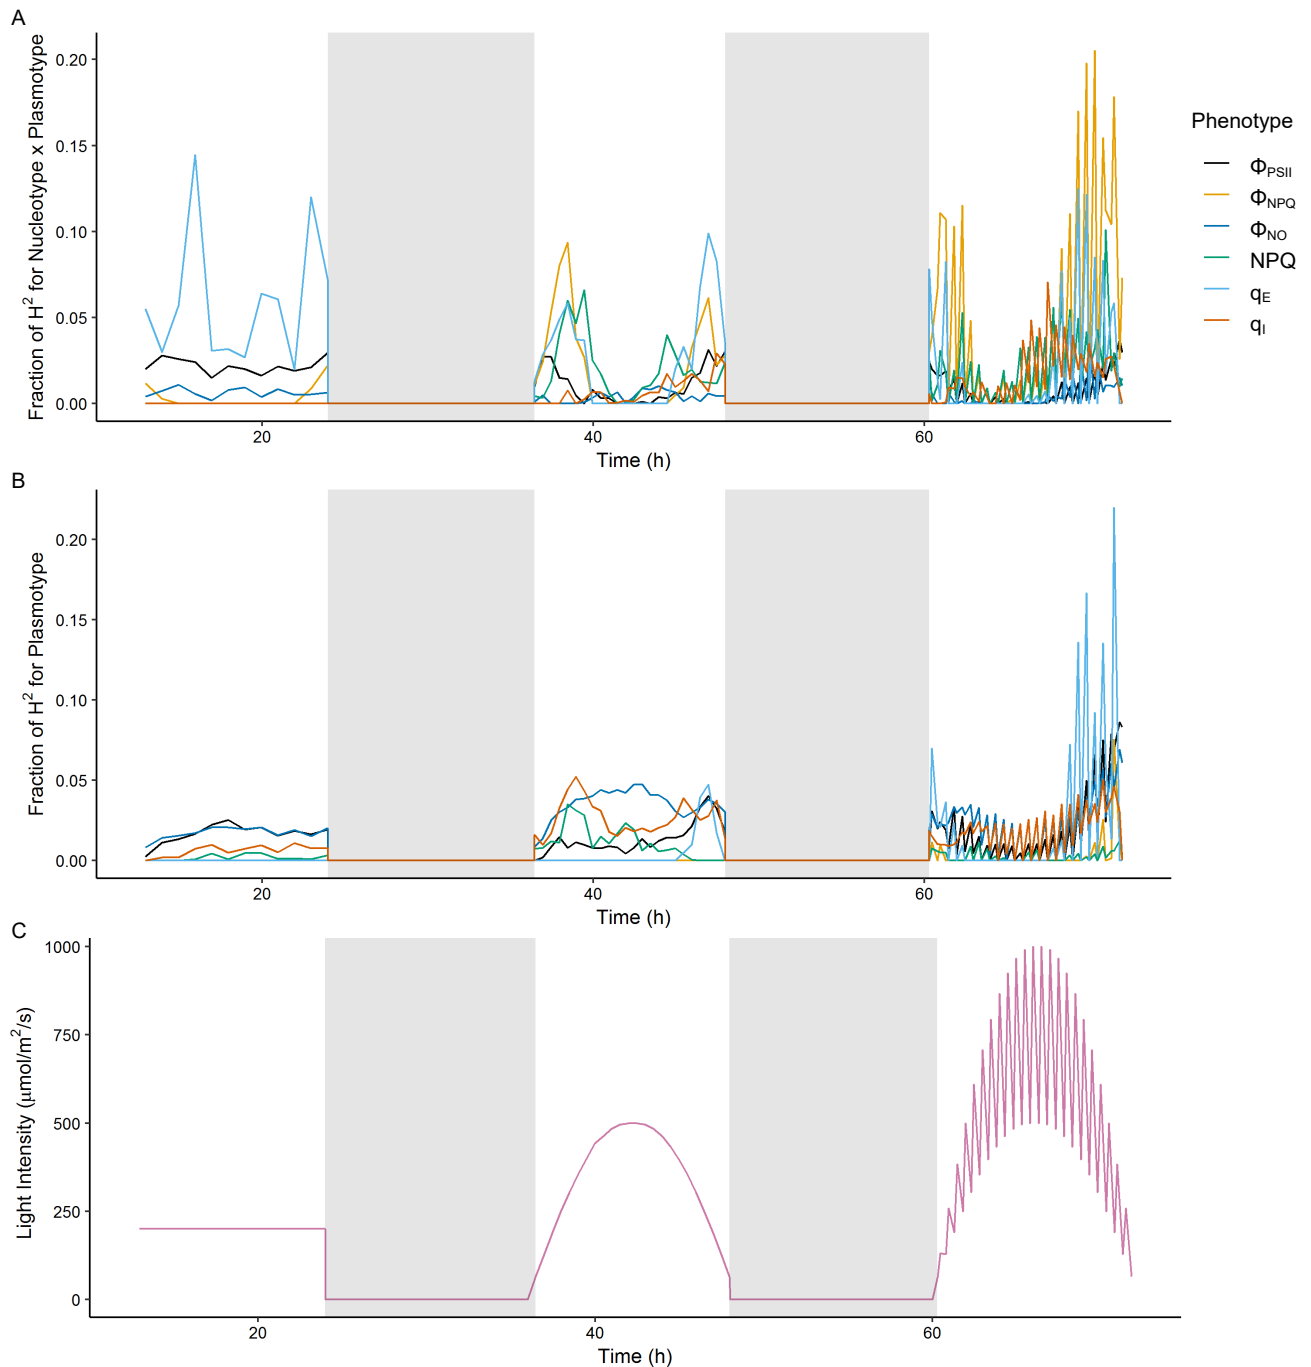

191 **Figure 3. The fraction of explained genetic variation ( $H^2$ ) for photosynthesis phenotypes differs**  
192 **depending on light conditions.** A) shows the fraction of  $H^2$  for plasmotype epistatic effects. B) shows  
193 the fraction of  $H^2$  for plasmotype additive effects. C) shows the light intensity for three consecutive days  
194 with growth under steady light (day 1), sinusoidal light intensity (day 2) and fluctuating light intensity  
195 (day 3). Days are separated by nights (shaded areas). Note that the fraction of  $H^2$  for different  
196 phenotypes changes markedly during days 2 and 3. Some phenotypes are explained largely by additive  
197 effects (i.e.  $q_E$ ) while others by interaction (i.e.  $\Phi_{NPQ}$ ). A replication of this experiment is shown in  
198 Supplementary Fig. 8.

199            Though the average total explained variance due to the cytonuclear epistasis is only 5.2%, these  
200 interactions can have strong effects for specific phenotypes or in specific cybrids. Explained variance  
201 for some phenotypes can be markedly higher, for example for projected leaf area this amounts to 12.3%,  
202 for hyponastic leaf movement to 8.3% and for  $\Phi_{NPQ}$  to 17.8%. A strong epistatic effect in pollen abortion  
203 (43.5%) was due to relatively high pollen abortion in Sha<sup>Sha</sup> (Fig. 2A) that we also observed in Sha  
204 wildtype. The increased pollen abortion in its native nucleotype is surprising and could indicate either  
205 incomplete compensation due to the accumulation of deleterious variants or perhaps to facilitate  
206 increased outcrossing. The only cybrid for which we initially failed to obtain seed was Ely<sup>Sha</sup>. This haploid  
207 was regenerated and pollinated with wild-type Ely pollen to increase the chance of seed set. The diploid  
208 offspring showed 45% of pollen abortion and were male sterile, indicating that in combination with the  
209 Ely nucleotype the Sha plasmotype results in cytoplasmic male sterility (Supplementary Fig. 9). In  
210 combination with the Sha plasmotype pollen abortion across the seven nucleotypes can range from near  
211 zero, to 8.9% in Sha<sup>Sha</sup> and to full male sterility in Ely<sup>Sha</sup>, highlighting the strong epistasis that can be  
212 present.

213            Cybrids with the Ely plasmotype exhibit clear additive effects: all have a lower PSII efficiency  
214 ( $\Phi_{PSII}$ ) (Fig. 2B) and lower values for other photosynthesis related phenotypes i.e. NPQ,  $q_E$  and  
215 chlorophyll content (Fig. 2C and Supplementary Data 2). This reduced  $\Phi_{PSII}$  is likely to be responsible  
216 for the concomitant reductions in biomass, growth rate and seed size and altered primary metabolite  
217 content (Supplementary Data 2). To test whether additive effects could also be detected at the level of  
218 gene expression we contrasted the transcriptome of Ely<sup>Ely</sup> with that of the Ely<sup>Ler</sup> and Ely<sup>Bur</sup> cybrids. We  
219 also compared the transcriptomes of Ler<sup>Ler</sup>, Ler<sup>Bur</sup>, and Ler<sup>Ely</sup> (Supplementary Data 3; for details see  
220 Supplementary Fig. 10 and Supplementary Table 5). Exchanging the Ely plasmotype with Ler or Bur, in  
221 either the Ler or Ely nuclear background resulted in a consistent change in the expression of 40 genes,  
222 of which most were upregulated (Supplementary Table 6). A GO-term analysis revealed that these  
223 genes are significantly enriched for those involved in photorespiration (GO:0009853) and in glycine- and  
224 serine family amino acid metabolism (GO:0006544 and GO:0009069) (Supplementary Data 3). This is  
225 in line with the low serine and glycine content of cybrids with the Ely plasmotype which suggests reduced  
226 photorespiration (Supplementary Data 2) (Somerville and Ogren, 1980) and can be linked to lower  
227 overall photosynthetic activity.

228 The Ely plasmotype was deliberately included in our panel for its strong additive effect. In  
229 addition to Ely we also observed strong additive effects from the Bur plasmotype which are mainly  
230 restricted to the photosynthetic parameters. Under normal conditions PSII efficiency is slightly increased  
231 by the Bur plasmotype (1.6%), however when fluctuating the light intensity, this difference becomes  
232 more apparent (3.5% increase) (Fig. 2B and 3). This increase in  $\Phi_{PSII}$ , under fluctuating conditions  
233 results in a corresponding reduction in  $\Phi_{NO}$  and  $\Phi_{NPQ}$  of 7.3% and 2.2% respectively. NPQ,  $q_E$  and  $q_I$   
234 are also influenced by the plasmotype, but the time points at which these differences occur differs per  
235 phenotype (Fig. 3A and B). The Bur plasmotype increases NPQ, with the largest increase of 5.9% at  
236 the beginning of day 2 (38.46h) (Fig. 2C), while the rapidly reversible component of NPQ,  $q_E$ , has a  
237 maximum reduction of 26.6% at the end of day 3 (71.46h) (Fig. 2D).

238 These photosynthesis-related phenotypes are likely to be due to chloroplast-derived variation.  
239 In support of a chloroplastic origin for this photosynthetic variation, measurements of mitochondrial  
240 respiration suggest that Bur is not an outlier and shows standard respiration rates (Supplementary Fig.  
241 11). Based on coverage plots there are no obvious duplications or deletions in the mitochondrial or  
242 chloroplast sequence of Bur thus we expect that altered expression or protein activity as opposed to  
243 gene gain or loss is driving the Bur derived phenotypes (Supplementary Fig. 12). We annotated the  
244 sequence variation of all plasmotypes using SnpEff (Cingolani et al., 2012). From this we found no large  
245 effect mutations in the Bur mitochondria. There were, however, unique missense variants in the  
246 chloroplastic genes MATURASE K (MATK), NAD(P)H-QUINONE OXIDOREDUCTASE SUBUNIT 6  
247 (NDHG) and chloroplast open reading frame 1 (YCF1) as well as a frameshift mutation in tRNA-Lys  
248 (TRNK) (Supplementary Data 4). NDHG is part of the NAD(P)H-dehydrogenase-like complex (NDH).  
249 NDH is located inside the thylakoid membrane and acts, amongst others, as a proton pump in cyclic  
250 electron flow around photosystem I and chlororespiration. NDH creates a pH differential that can be  
251 causative of the observed non-photochemical quenching phenotypes (Strand et al., 2017; Laughlin et  
252 al., 2019). In contrast to Ely, the plasmotype which evolved in response to the use of herbicides, an  
253 anthropogenic selective pressure (Flood et al., 2016), the Bur plasmotype represents a naturally  
254 occurring plasmotype that has an additive impact on key photosynthetic phenotypes.

255 Our experiments have shown that a clean, systematic exploration of plasmotypic variation in a  
256 plant species is feasible. To our knowledge, apart from the *cenh3* mutant used here, there is only one  
257 other intraspecific haploid inducer available (the maize *ig* mutant) which can be used via the maternal

258 line and thus replace the plasmotype (Kermicle, 1969; Schneerman et al., 2000; Houben et al., 2011).  
259 Current knowledge of *cenH3* mediated uniparental genome elimination should allow for the creation of  
260 maternal haploid inducers in a wider range of species (Karimi-Ashtiyani et al., 2015). This would allow  
261 elite nucleotypes to be brought into new plasmotypic backgrounds to explore novel plasmotype-  
262 nucleotype combinations. Our data indicate that there is substantial variation for phenotypes such as  
263 NPQ and  $\Phi_{PSII}$  which are important for plant productivity (Flood et al., 2011; Kromdijk et al., 2016;  
264 Murchie et al., 2018). Next to Ely, we identified one new plasmotype (Bur) that significantly impacts  
265 photosynthesis in an additive manner. Expanding our panel would likely find more, suggesting that future  
266 research aiming to enhance crop photosynthesis should pay close attention to available plasmotypic  
267 variation. Apart from studying natural variation, the use of haploid inducers as plasmotype donors could  
268 be used to transfer cytoplasmic male sterility (CMS), herbicide resistances or genetically engineered  
269 plasmotypes. Plant plasmotypes, are notoriously difficult to genetically modify, although recently there  
270 have been some advances in this regard (Jin and Daniell, 2015; Zhang et al., 2015; Kwak et al., 2019;  
271 Ruf et al., 2019). The use of haploid inducers as plasmotype donors could further increase the  
272 accessibility of such modifications as transformations could be undertaken in a compatible nucleotype  
273 and once achieved can be transferred into different nucleotypes, thus amplifying the potential impact of  
274 successful plasmotype modifications.

275 Exploring the potential of plasmotypic variation via the use of haploid inducer lines is not only  
276 promising for plant breeding, but also for understanding the role such variation plays in plant adaptation  
277 (Bock et al., 2014; Dobler et al., 2014). Our results show that despite considerable genetic divergence  
278 between the genotypes used in our panel, all cybrids were viable, this in itself suggests a remarkable  
279 degree of conservation for the fundamental components of cytonuclear interactions. Although we do  
280 find clear additive effects of some plasmotypes, the majority of the plasmotype derived variation  
281 manifests as epistasis in the traits we measured which is in line with previous research in plants, animals,  
282 and fungi (Zeyl et al., 2005; Dowling et al., 2007; Montooth et al., 2010; Joseph et al., 2013; Roux et al.,  
283 2016). Also in line with studies of mitonuclear interactions in animals is the observation that phenotypic  
284 variation due to plasmotypic variation becomes more pronounced under fluctuating and stressful  
285 conditions (Dowling et al., 2007; Hoekstra et al., 2013; Mossman et al., 2016; Hill et al., 2019). Both our  
286 results and previous work suggests that multilevel interactions (i.e. Nucleotype x Plasmotype x  
287 Environment) may be the primary mechanism by which plasmotypic variation is expressed. Thus,

288 plasmotypic variation may act as an evolutionary capacitor providing novel phenotypes in specific  
289 genetic and environmental contexts, such variation may be particularly important for both crops and wild  
290 species in our rapidly changing climate.

291

292 **Online methods**

293 *Plant materials:* Seven *Arabidopsis* accessions were chosen for the construction of a full nucleotype-  
294 plasmotype diallel. Ely (CS28631) is atrazine resistant due to a chloroplast-encoded mutation in *PsbA*  
295 which leads to a modified D2 protein that greatly reduces PSII efficiency (El-Lithy et al., 2005). Ws-4  
296 (CS5390) was included for its unusual photosystem II phosphorylation dynamics (Yin et al., 2012). Bur  
297 (CS76105) is commonly used in diversity panels and is a standard reference accession. Sha (CS76227)  
298 was selected based on its capacity to induce cytoplasmic male sterility in some crosses (Gobron et al.,  
299 2013). The set was completed by adding *Ler* (CS76164), *Col* (CS76113) and *C24* (CS76106) which are  
300 three widely used genotypes in *Arabidopsis* research. *Col* is the reference genome for nuclear and  
301 chloroplast sequences and *C24* for the mitochondrial sequence. The *GFP-tailswap* haploid-inducer that  
302 expresses a GFP-tagged CENTROMERE HISTONE 3 protein in a *cenh3/htr12* mutant background, is  
303 in a *Col* background (Ravi and Chan, 2010).

304

305 *Generation of a nucleotype-plasmotype diallel:* To generate new nucleotype-plasmotype combinations,  
306 plants of all seven accessions (*Bur*, *C24*, *Col*, *Ely*, *Ler*, *Sha* and *Ws-4*) were crossed as males to *GFP-*  
307 *tailswap* resulting in all cybrids with the *Col* plasmotype. New HI lines were created by crossing the  
308 original *GFP-tailswap* line as a male to the six additional plasmotype mothers (*Bur*, *C24*, *Ely*, *Ler*, *Sha*  
309 and *Ws-4*). Genome elimination does not always occur and some of the offspring were diploid F1 lines.  
310 These were selfed and F2 lines homozygous for the *cenh3/htr12* mutation and carrying the *GFP-*  
311 *tailswap* were selected as new HI lines in different plasmotypic backgrounds (Fig. 1A). Plants of all  
312 seven accessions were then crossed as males to these new HI lines and the haploids arising from these  
313 49 crosses were identified based on their phenotype (as described in Wijnker et al. (2014)). These  
314 haploid lines self-fertilized, either following somatic genome duplication or after restitutional meiosis  
315 (Ravi and Chan, 2010), and gave rise to doubled haploid offspring (Fig. 1B). The resulting 49 lines  
316 comprise a full diallel of 21 pairs of reciprocal nucleotype-plasmotype combinations (cybrids) as well as  
317 seven nucleotype-plasmotype combinations that have, in principle, the same nucleotype-plasmotype  
318 combinations as their wild-type progenitors (self-cybrids; Fig. 1C, diagonal). All cybrids and the wild-  
319 type accessions were propagated for one generation before use in further experiments, with the  
320 exception of *Ely*<sup>Sha</sup> of which the original haploid died without setting seed and was recreated at a later  
321 stage by generating haploids that were pollinated with *Ely* wild-type plants to ensure seed set.

322

323 *Genotype confirmation:* To confirm that all cybrids in our panel are authentic, all 49 cybrids and 7 wild-  
324 type progenitors were whole-genome sequenced at the Max Planck Genome Centre Cologne  
325 (Germany) using Illumina Hiseq 2500 150-bp paired-end sequencing. The cybrids were sequenced at  
326 8.5X coverage and the wild-type progenitors at 40X coverage. To remove erroneous bases, we  
327 performed adapter and quality trimming using Cutadapt (version 1.18) (Martin, 2011). Sequences were  
328 clipped if they matched at least 90% of the total length of one of the adapter sequences provided in the  
329 NEBNext Multiplex Oligos for Illumina® (Index Primers Set 1) instruction manual. In addition, we  
330 trimmed bases from the 5' and 3' ends of reads if they had a phred score of 20 or lower. Reads that  
331 were shorter than 70 bp after trimming were discarded. Trimmed reads were aligned to a modified  
332 version of the *A. thaliana* Col-0 reference genome (TAIR10, European Nucleotide Accession number:  
333 GCA\_000001735.2) which contains an improved assembly of the mitochondrial sequence (Genbank  
334 accession number: BK010421) (Sloan et al., 2018) using bwa mem (version 0.7.10-r789) (Li, 2013) with  
335 default parameters. The resulting alignment files were sorted and indexed using samtools (version 1.3.1)  
336 (Li et al., 2009). Duplicate read pairs were marked using the MarkDuplicates tool of the GATK suite  
337 (version 4.0.2.1), using an optical duplicate pixel distance of 100, as recommended in the documentation  
338 of GATK when working with data from unpatterned Illumina flowcells. Variants were called using a  
339 workflow based on GATK Best Practices. Base quality scores of aligned reads were recalibrated using  
340 GATK BaseRecalibrator with default parameters, using a set of variants of a world-wide panel of 1135  
341 *A. thaliana* accessions (The 1001 Genomes Consortium, 2016) (obtained from  
342 [ftp://ftp.ensemblgenomes.org/pub/plants/release-37/vcf/arabidopsis\\_thaliana/](ftp://ftp.ensemblgenomes.org/pub/plants/release-37/vcf/arabidopsis_thaliana/)) as known sites.  
343 Following base recalibration, variants were called in each sample using GATK HaplotypeCaller, allowing  
344 for a maximum of three alternate alleles at each site. Samples were then jointly genotyped using GATK  
345 GenomicsDBImport and GATK GenotypeGVCFs with default parameters. This last step generated three  
346 different VCF files: one containing the calls of the nuclear genome, one containing calls of the  
347 mitochondrial genome and one containing calls of the chloroplast genome.

348 To remove likely false positive calls, we filtered the callsets using two complementary  
349 approaches. First, we filtered the nuclear callset using GATK VariantRecalibrator and GATK  
350 ApplyVQSR (--truth-sensitivity-filter-level set at 99.9), using the set of variants called in the world-wide  
351 panel of 1135 *A. thaliana* accessions as a training and truth set (prior=10.0). This step could not be

352 performed for the mitochondrial and chloroplast calls, as these lack a golden truth set that can be used  
353 for recalibration. Second, we filtered variants based on their quality by depth score (QD). For the nuclear  
354 callset, we used a QD score of 40, leaving 3.7 million SNPs, for the chloroplast callset a QD of 25,  
355 leaving 356 SNPs and for the mitochondrial callset a QD of 20, leaving 135 SNPs.

356 46 cybrids were found to have the correct genotypes. With one line, Bur<sup>Ws-4</sup>, there was a sample  
357 mix-up during library preparation with Sha<sup>Sha</sup>. Leading to two Sha<sup>Sha</sup> samples and no sequenced Bur<sup>Ws-</sup>  
358 <sup>4</sup> sample. Fortunately, we did have a true Bur<sup>Ws-4</sup> cybrid, which we confirmed via both phenotype (Bur  
359 and Sha nucleotypes are phenotypically distinct from one another) and genotype through the KASP<sup>TM</sup>  
360 markers (see below) (Supplementary Table 8). To confirm the Sha cybrids we therefore used the Sha  
361 genotype (CS76382) from the 1001 genomes project (The 1001 Genomes Consortium, 2016). Two  
362 other lines, C24<sup>C24</sup> and Ws-4<sup>Col</sup>, had a high number of heterozygous calls in their plasmotypes, with  
363 C24<sup>C24</sup> being heterozygous with C24<sup>Col</sup> and Ws-4<sup>Col</sup> being heterozygous with Ws-4<sup>Bur</sup>. As in the  
364 production of Ws-4<sup>Col</sup> no plant was used with a Bur plasmotype, this cannot be heteroplasmy. To ensure  
365 that this was a sample mix-up and the putative event of cross-contamination had occurred in the  
366 laboratory, we designed KASP<sup>TM</sup> makers (LGC, <https://www.lgcgroup.com>) and genotyped all lines.  
367 These KASP<sup>TM</sup> markers are designed to be unique to the chloroplast of one accession, and designed  
368 on SNPs that were called heterozygous in the sequence analysis (Supplementary Table 7). The KASP<sup>TM</sup>  
369 assay can distinguish between both homozygous or heterozygous states. We ran all seven KASP<sup>TM</sup>  
370 markers on all lines, for C24<sup>C24</sup> and Ws-4<sup>Col</sup> this included plants from the same seed batch as the plants  
371 used for sequencing, as well as direct offspring of the sequenced plants. All lines showed the correct  
372 genotypes, and no heterozygosity was observed in any of the lines, including C24<sup>C24</sup> and Ws-4<sup>Col</sup>  
373 (Supplementary Table 8). Unfortunately, the Ely<sup>Sha</sup> used for sequencing died before setting seed and  
374 although it has since been recreated, it could not be included in our phenotypic analyses. We have used  
375 the KASP<sup>TM</sup> marker for the Sha chloroplast, and confirmed it to be correct (Supplementary Table 8).

376 To check for any incomplete chromosome elimination, we calculated the read coverage for all  
377 cybrids, normalized per chromosome. We did not observe any remaining chromosomes, although we  
378 found a 200kb duplication of nuclear DNA in Bur<sup>Bur</sup> and Bur<sup>C24</sup>. In Bur<sup>C24</sup> and the self-cybrid Bur<sup>Bur</sup> we  
379 discovered the presence of a duplicated segment on chromosome 2. Because this duplicated segment  
380 is present (and identical) in two independent cybrid lines and this segment is of a Bur nuclear origin (i.e.  
381 there are only Bur SNPs in this region), we conclude this segment results from a *de-novo* duplication in



382 one of the wild-type Bur lines used to generate these cybrids. Following the exclusion of phenotyping  
383 data for Bur<sup>Bur</sup> and Bur<sup>C24</sup> we limited our analyses to 46 rather than 49 cybrids. The parental lines were  
384 included in the screens to test for possible unforeseen effects of cybrid production (which involves a  
385 haploid growth stage). This brings the number of phenotyped lines in this study to a total of 53 (40  
386 cybrids, 6 self-cybrids and 7 wild types).

387 The functional effects of the chloroplastic and mitochondrial SNPs and INDELS were predicted  
388 using SnpEff (Cingolani et al., 2012). A SnpEff database was built using the genome, transcriptome and  
389 proteome as released in TAIR10.1. SNPs and INDELS were predicted on the filtered VCF, as mentioned  
390 above. In the analysis we only considered variants with a “HIGH” or “MODERATE” impact.

391

392 *Phenotyping:* Cybrids were phenotypically assessed using different platforms. For details on the number  
393 of phenotypes per experiment see Supplementary Table 4.

394 Growth, PSII efficiency ( $\Phi_{PSII}$ ), chlorophyll reflectance and leaf movement (all parameters at  
395  $n=24$ ) was screened in the Phenovator platform, a high-throughput phenotyping facility located in a  
396 climate-controlled growth chamber (Flood et al., 2016). This phenotyping platform measured the plants  
397 for:  $\Phi_{PSII}$  using chlorophyll fluorescence, reflectance at 480 nm, 532 nm, 550 nm, 570 nm, 660 nm, 700  
398 nm, 750 nm and 790 nm, and projected leaf area (PLA) based on pixel counts of near infra-red (NIR)  
399 images (Flood et al., 2016). The growth chamber was set to a 10 h day/14 h night regime, at 20°C day  
400 and 18°C night temperature, 200  $\mu\text{mol m}^{-2} \text{s}^{-1}$  irradiance, and 70% relative humidity. The plants were  
401 grown on a rockwool substrate and irrigated daily with a nutrient solution as described in Flood et al.  
402 (2016).

403 Growth ( $n=24$ ) and subsequently above ground biomass ( $n=12$ ) was measured in another high-  
404 throughput phenotyping facility (Kokorian et al., 2010), where projected leaf area was measured three  
405 times per day with 14 fixed cameras (uEye Camera, IDS Imaging Development Systems GmbH,  
406 Obersulm, Germany). This growth chamber was set to a 10 h day/14 h night regime, at 20°C day and  
407 14°C night temperature, 200  $\mu\text{mol m}^{-2} \text{s}^{-1}$  light and 70% relative humidity. Plants were grown on rockwool  
408 and irrigated weekly with a nutrient solution as described before.

409 Non-fluctuating and fluctuating light treatments were performed in the DEPI phenotyping facility  
410 of Michigan State University ( $n=4$ )(Cruz et al., 2016). This facility is able to measure the chlorophyll  
411 fluorescence derived photosynthetic parameters,  $\Phi_{PSII}$ ,  $\Phi_{NO}$ ,  $\Phi_{NPQ}$ , NPQ,  $q_E$ ,  $q_I$ . Three-week-old plants

412 were moved into the facility, where they were left to acclimatize for 24 hours after which three days of  
413 phenotyping was performed under different light regimes. On the first day the plants were illuminated  
414 with a constant light intensity of  $200 \mu\text{mol m}^{-2} \text{s}^{-1}$ . On the second day the plants received a sinusoidal  
415 light treatment where the light intensity began low and gradually increased to a maximum of  $500 \mu\text{mol}$   
416  $\text{m}^{-2} \text{s}^{-1}$  light from which it decreased back down to 0. On the third day the plants received a fluctuating  
417 light treatment ranging between 0 and  $1000 \mu\text{mol m}^{-2} \text{s}^{-1}$  light in short intervals (Fig. 3C). For the second  
418 experiment in the DEPI phenotyping facility the experiment was extended with 2 days, in which day 4  
419 replicated day 2 and day 5 replicated day 2 (Supplementary Data 1 and Supplementary Fig. 8C). For  
420 further details see Cruz et al. (2016).

421 Bolting time and flowering time were measured on all cybrids ( $n=10$ ) in a greenhouse  
422 experiment in April 2017, with the exception of Ely nucleotide cybrids which needed vernalisation and  
423 were not included in this experiment. Additional lighting was turned on when the natural light intensity  
424 fell below  $685.5 \mu\text{mol m}^{-2} \text{s}^{-1}$ , and turned off when the light intensity reached  $1142.5 \mu\text{mol m}^{-2} \text{s}^{-1}$ , with a  
425 maximum of 16 h per day.

426 Seeds for the germination experiments were generated from two rounds of propagation. In the  
427 first-round seeds were first sown in a growth chamber set to a 10 h day/14 h night regime, at  $20^\circ\text{C}$  day  
428 and  $18^\circ\text{C}$  night temperature,  $200 \mu\text{mol m}^{-2} \text{s}^{-1}$  light intensity, and 70% relative humidity. After three weeks  
429 they were moved to an illuminated cold room at  $4^\circ\text{C}$  for six weeks of vernalization. After vernalization  
430 all plants ( $n=8$ ) were moved to a temperature-controlled greenhouse ( $20^\circ\text{C}$ ) for flowering and seed  
431 ripening. Exceptions to this were *Ler<sup>Ely</sup>*, *Ler<sup>Ws-4</sup>*, and *Ely<sup>Ws-4</sup>* for which no doubled haploid seed was  
432 available at the beginning of the first propagation round. *Ler<sup>Ely</sup>* and *Ler<sup>Ws-4</sup>* were sown later, during the  
433 vernalization stage and flowered at the same time as the vernalized plants. *Ely<sup>Ws-4</sup>* produced haploid  
434 seed at a later stage and could not be included in the first propagation round. Plants were grown in a  
435 temperature-controlled greenhouse set at  $20^\circ\text{C}$ . In this round only lines with the Ely nucleotide were  
436 vernalized. For the germination experiments seeds were stratified on wet filter paper for four days at  
437  $4^\circ\text{C}$  before being assayed in the Germinator platform (Joosen et al., 2010) for seed size, germination  
438 rate and total germination percentage. Germination under osmotic stress was performed on filter paper  
439 with 125 mM NaCl. For the controlled deterioration treatment, seeds were incubated for 2.5, 5 or 7 days  
440 at  $40^\circ\text{C}$  and 82% RH and subsequently assayed in the Germinator platform without stratification.

441 To assess pollen abortion all cybrid lines and wild-type progenitors (except those with the Ely  
442 nucleotype) were grown simultaneously in a growth chamber (Percival) under controlled conditions  
443 (16H/ 8H light cycle, 21°/18° °C and 50%-60% relative humidity). Pollen abortion was manually  
444 assessed for all the ecotypes by using a differential staining of aborted and non-aborted pollen grains  
445 (Peterson et al., 2010). A total of three plants and three flowers per plant of each cybrid were collected  
446 on the same day and submerged in a drop of 13  $\mu$ l of phenol-free Alexander staining solution placed  
447 on a glass slide with a glass cover slip of 18x18 mm. For each flower 250 pollen grains were counted  
448 and the number of aborted pollen therein.

449 Oxygen consumption of seedlings was measured in 2 mL of deionized water with a liquid-  
450 phase Oxytherm oxygen electrode system (Hansatech Instruments) calibrated at the measurement  
451 temperature. Three-day-old seedlings (about 50 mg) were directly imbibed in the electrode chamber.  
452 The rates of oxygen consumption were measured after tissue addition and subtracted from the rates  
453 after addition of 500  $\mu$ M KCN. Results are the mean of at least five measurements. Measurements for  
454 different genotypes were performed on consecutive days, and to correct for daily variation, normalized  
455 to Col-0 samples that were run daily.

456  
457 *Metabolomics*: Plant material for primary metabolite analysis was obtained from the 'Phenovator'  
458 photosynthetic phenotyping experiment. Plants were harvested 26 days after sowing, which due to the  
459 10-hr photoperiod was prior to bolting for all lines. Samples were frozen in liquid nitrogen, and samples  
460 of each genotype were subsequently combined into four pools each made up of material of  
461 approximately six replicates. Each pool was ground and homogenized before an aliquot was taken for  
462 further analysis. Reference samples for the metabolite analysis were composed of material from all  
463 seven parents in equal amounts and then homogenized. The method used for the extraction of polar  
464 metabolites from *Arabidopsis* leaves was adapted from Lisec et al. (2006) as described by Carreno-  
465 Quintero et al. (2012). Specific adjustments for *Arabidopsis* samples were made as follows; the polar  
466 metabolite fractions were extracted from 100 mg of *Arabidopsis* leaf material (fresh weight, with max.  
467 5% deviation). After the extraction procedure, 100  $\mu$ L aliquots of the polar phase were dried by vacuum  
468 centrifugation for 16 hours. The derivatization was performed on-line similar as described by Lisec et al.  
469 (2006) and the derivatized samples were analyzed by a GC-ToF-MS system composed of an Optic 3  
470 high-performance injector (ATAS™, GL Sciences, Eindhoven, The Netherlands) and an Agilent 6890

471 gas chromatograph (Agilent Technologies, Santa Clara, California, United States) coupled to a Pegasus  
472 III time-of-flight mass spectrometer (Leco Instruments, St. Joseph, Michigan, United States). Two  
473 microliters of each sample were introduced in the injector at 70°C using 5% of the sample (split 20). The  
474 detector voltage was set to 1750 Volts. All samples were analyzed in random order in four separate  
475 batches. The systematic variation that inadvertently is introduced by working in batches, was removed  
476 upon analysis of covariance. In this model the batch number was used as a factor (four levels) and “run  
477 number within a batch” as a covariate since it is also expected that (some) variation will be introduced  
478 by the sample run order within each batch. For this the S2 method described by (Wehrens et al., 2016)  
479 was used to perform the least-squares regression. After quality control and removing metabolites with  
480 more than 20% missing data and a broad sense heritability ( $H^2$ ) of less than 5%, we were left with data  
481 on 41 primary metabolites. Metabolites were identified based on the Level of Identification Standard of  
482 the Metabolomics Standards Initiative (Sumner et al., 2007).

483

484 *Transcriptome analysis:* Using the same material as described in the metabolome analysis, total RNA  
485 was extracted from six cybrids, three in a *Ler* and three in an *Ely* nuclear background:  $Ler^{Ler} Ler^{Ely}$ ,  $Ler^{Bur}$   
486 and  $Ely^{Ler} Ely^{Ely}$ ,  $Ely^{Bur}$  with three replicates per genotype, totaling 18 plants. Library preparation was  
487 done with a selection on 3' polyadenylated tails to preferentially include nuclear mRNA. Read alignment  
488 was done using TopHat (Trapnell et al., 2009). Any chloroplast and mitochondrial genes remaining were  
489 excluded from further analysis. The raw counts were normalized and analyzed using the DeSeq2  
490 package in R (Love et al., 2014). Genes for which the expression levels were significantly different  
491 between two cybrids were determined by comparing two genotypes using the contrast function of  
492 DeSeq2. P-values were determined using the Wald test, and p-values were adjusted using the  
493 Benjamini-Hochberg correction ( $\alpha=0.05$ ). GO enrichment analysis was done using default setting in  
494 g:profiler (g:GOST). The complete set of detected genes in each cybrid was used as a statistical  
495 background in the analysis (Reimand et al., 2016).

496

497 *Phenotypic data analysis:* We used the self-cybrids as our baseline in phenotypic comparisons to control  
498 for any possible effects of cybrid creation, with the exception of  $Bur^{Bur}$  which was replaced in all analysis  
499 with  $Bur-WT$ . Raw data was directly analyzed except for time series data of growth and chlorophyll  
500 reflectance which was preprocessed as follows. Time series data were fitted with a smooth spline using

501 the gam function from the mgcv package in R (Wood et al., 2016). The fitted B-spline was subsequently  
502 used to derive curve parameters. These include area under the curve, slope under mean, first, second  
503 (median) and third quartile, minimal and maximal slope, and the timepoint where the slope is maximum.  
504 These parameters allow us to quantify not only plant size and growth rate but also the dynamic  
505 properties of the growth curve, i.e. did growth occur early or late, or was it more uniform? In addition,  
506 we calculated relative growth rate per time point by dividing the growth rate, relative to the plant size  
507 (Flood et al., 2016). All raw parameters and derived parameters were analyzed by fitting either a linear  
508 mixed model or a linear model. The linear mixed model was used when a random correction parameter  
509 was present, when such random correction parameters were absent a linear model was used. The  
510 models were analyzed using the Restricted Maximum Likelihood (REML) procedure for each relevant  
511 phenotype using the lme4 package in R (Bates et al., 2015). As each experiment had a different design,  
512 several models were employed (Supplementary Table 4). The following model was generally used, in  
513 some instances random terms (underlined below) were added:

514

$$516 \quad \underline{Y} = \underline{Nucleotype} + \underline{Plasmotype} + (\underline{Nucleotype} * \underline{Plasmotype}) + \underline{Block} + \underline{\varepsilon} \quad (1)$$

515

517 For every model, normality and equal variances were checked. Next for every phenotypic parameter we  
518 calculated significant difference, for the plasmotype and interaction term of the model (equation 1). This  
519 was done by ANOVA in which Kenward-Roger approximation for degrees of freedom was used. As  
520 posthoc tests we used a two-sided Dunnett's test, where we tested whether a given cybrid was different  
521 from the self-cybrid control, within one nucleotype. Two side Hochberg's posthoc tests were used when  
522 all pairwise comparisons were tested within one nucleotype (to test for epistasis) and across all  
523 nucleotypes (to test for additivity). The significance threshold for all posthoc tests was set at  $\alpha=0.05$ .  
524 The contribution of the nucleotype, plasmotype and the interaction between the two, was determined by  
525 estimating the variance components in mixed models containing the same terms as in model (1).  
526 However, the fixed terms were taken as random:

527

$$528 \quad \underline{Y} = \underline{Nucleotype} + \underline{Plasmotype} + (\underline{Nucleotype} * \underline{Plasmotype}) + \underline{Block} + \underline{\varepsilon},$$

529

530 Where the variance components were estimated by the VarCorr function from the lme4 package. Total  
531 variance was calculated by summing all the variance components, after which the fraction explained  
532 variance for every term in the model was calculated. The broad sense heritability, in our case equal to  
533 repeatability (Falconer and Mackay, 1996), is determined by the three genetic components, i.e.  
534 nucleotype, plasmotype and their interaction. The fraction of broad sense heritability explained by the  
535 separate genetic components was calculated subsequently.

536 In total we measured 1859 phenotypes. After data processing, further analysis was only  
537 conducted on phenotypes with a broad sense heritability higher than 5%, removing phenotypes that  
538 were non-informative, leaving with 1782 phenotypes. Furthermore, to avoid biases in the results due to  
539 overly correlated data when stating summary statistics, we further subset the remaining 1782  
540 phenotypes (Supplementary Data 2). Using a threshold based purely on correlation would favor the  
541 inclusion of variation largely driven by the nucleotype. Because the population is balanced, we therefore  
542 subtracted the averages of the nucleotype values from the cybrid phenotype values, to reveal the  
543 plasmotype effect per cybrid. From these we calculated the Pearson correlations for all phenotypes. This  
544 highlighted that the most uncorrelated phenotypes mainly stem from one experiment assessing  
545 photosynthetic parameters under fluctuating light. The unbiased selection of a subset of phenotypes  
546 would result in the omission of several phenotypic categories. To present a balanced overview of all  
547 phenotypic categories we manually selected a subset comprising the following phenotypes. For time  
548 series in which we scored for up to 25 days after germination, we selected the morning measurements  
549 of day 8, 13, 18 and 23. The time series analysis of fluctuating light were measured for three (first  
550 experiment, Fig. 3) and five days (replicate experiment; Supplementary Fig. 8) in a row, with each day  
551 subjected to a different treatment. As these treatments reached their extremes in the middle and at end  
552 of the day, and the results of replicate experiments were very similar, we selected time points in the  
553 middle and at the end of the day of only the first experiment. For the different seed treatments we used  
554 the germination time until 50% of the seeds germinated. In addition, we included biomass, leaf  
555 movement, seed size, flowering time as single phenotypes and all 36 primary metabolites. This resulted  
556 in 92 phenotypes, that are used for giving summary- and test statistics (for a correlation plot of these,  
557 please see Supplementary Fig. 6). All data on the 1859 phenotypes, with summary- and test statistics  
558 are available in Supplementary Data 1 and Supplementary Table 3.

559           The correlation between plasmotype additive and plasmotype epistatic effects was calculated  
560 both with and without the Ely plasmotype. For both additive and epistatic effects every significant change  
561 between plasmotypes, within one nucleotide background, was counted (Supplementary Data 2). The  
562 Pearson correlation coefficients and accompanying p-values were calculated using the ggpubr package  
563 in R.

564

565

566



567 **References:**

- 568 **Bates D, Mächler M, Bolker B, Walker S** (2015) Fitting linear mixed-effects models using lme4.  
569 Journal of Statistical Software **67**: 48
- 570 **Bock DG, Andrew RL, Rieseberg LH** (2014) On the adaptive value of cytoplasmic genomes in plants.  
571 Mol. Ecol. **23**: 4899-4911
- 572 **Carreno-Quintero N, Acharjee A, Maliepaard C, Bachem CWB, Mumm R, Bouwmeester H, Visser  
573 RGF, Keurentjes JJB** (2012) Untargeted Metabolic Quantitative Trait Loci Analyses Reveal a  
574 Relationship between Primary Metabolism and Potato Tuber Quality. Plant Physiology **158**:  
575 1306-1318
- 576 **Chan KX, Phua SY, Crisp P, McQuinn R, Pogson BJ** (2016) Learning the Languages of the Chloroplast:  
577 Retrograde Signaling and Beyond. **67**: 25-53
- 578 **Cingolani P, Platts A, Wang LL, Coon M, Nguyen T, Wang L, Land SJ, Lu X, Ruden DM** (2012) A  
579 program for annotating and predicting the effects of single nucleotide polymorphisms,  
580 SnpEff. Fly **6**: 80-92
- 581 **Cingolani P, Platts A, Wang LL, Coon M, Nguyen T, Wang L, Land SJ, Lu X, Ruden DM** (2012) A  
582 program for annotating and predicting the effects of single nucleotide polymorphisms,  
583 SnpEff: SNPs in the genome of *Drosophila melanogaster* strain w(1118); iso-2; iso-3. Fly **6**: 80-  
584 92
- 585 **Cruz JA, Savage LJ, Zegarac R, Hall CC, Satoh-Cruz M, Davis GA, Kovac WK, Chen J, Kramer DM**  
586 (2016) Dynamic Environmental Photosynthetic Imaging Reveals Emergent Phenotypes. Cell  
587 Systems **2**: 365-377
- 588 **Dobler R, Rogell B, Budar F, Dowling DK** (2014) A meta-analysis of the strength and nature of  
589 cytoplasmic genetic effects. J. Evolution Biol. **27**: 2021-2034
- 590 **Dowling DK, Abiega KC, Arnqvist G** (2007) TEMPERATURE-SPECIFIC OUTCOMES OF CYTOPLASMIC-  
591 NUCLEAR INTERACTIONS ON EGG-TO-ADULT DEVELOPMENT TIME IN SEED BEETLES. **61**: 194-  
592 201
- 593 **El-Lithy ME, Rodrigues GC, van Rensen JJS, Snel JFH, Dassen HJHA, Koornneef M, Jansen MAK, Aarts  
594 MGM, Vreugdenhil D** (2005) Altered photosynthetic performance of a natural *Arabidopsis*  
595 accession is associated with atrazine resistance. J. Exp. Bot. **56**: 1625-1634
- 596 **Falconer D, Mackay TJH, Essex, UK: Longmans Green** (1996) Introduction to quantitative genetics.  
597 1996. **3**
- 598 **Flood PJ, Harbinson J, Aarts MGM** (2011) Natural genetic variation in plant photosynthesis. Trends  
599 Plant Sci. **16**: 327-335
- 600 **Flood PJ, Kruijer W, Schnabel SK, Schoor R, Jalink H, Snel JFH, Harbinson J, Aarts MGM** (2016)  
601 Phenomics for photosynthesis, growth and reflectance in *Arabidopsis thaliana* reveals  
602 circadian and long-term fluctuations in heritability. Plant Methods **12**: 1-14
- 603 **Flood Pádraic J, van Heerwaarden J, Becker F, de Snoo CB, Harbinson J, Aarts Mark GM** (2016)  
604 Whole-Genome Hitchhiking on an Organelle Mutation. Current Biology **26**: 1306-1311
- 605 **Flood PJ, Yin L, Herdean A, Harbinson J, Aarts MGM, Spetea C** (2014) Natural variation in  
606 phosphorylation of photosystem II proteins in *Arabidopsis thaliana*: is it caused by genetic  
607 variation in the STN kinases? Philosophical Transactions of the Royal Society B: Biological  
608 Sciences **369**
- 609 **Gobron N, Waszczak C, Simon M, Hiard S, Boivin S, Charif D, Ducamp A, Wenes E, Budar F** (2013) A  
610 Cryptic Cytoplasmic Male Sterility Unveils a Possible Gynodioecious Past for *Arabidopsis*  
611 *thaliana*. PLoS ONE **8**: e62450
- 612 **Hill GE, Havird JC, Sloan DB, Burton RS, Greening C, Dowling DK** (2019) Assessing the fitness  
613 consequences of mitonuclear interactions in natural populations. **94**: 1089-1104
- 614 **Hoekstra LA, Siddiq MA, Montooth KL** (2013) Pleiotropic Effects of a Mitochondrial–Nuclear  
615 Incompatibility Depend upon the Accelerating Effect of Temperature in  
616 *Drosophila*. **195**: 1129-1139



- 617 **Houben A, Sanei M, Pickering R** (2011) Barley doubled-haploid production by uniparental  
618 chromosome elimination. **104**: 321-327
- 619 **Jin S, Daniell H** (2015) The Engineered Chloroplast Genome Just Got Smarter. *Trends in Plant Science*  
620 **20**: 622-640
- 621 **Joosen RVL, Kodde J, Willems LAJ, Ligterink W, van der Plas LHW, Hilhorst HWM** (2010) germinator:  
622 a software package for high-throughput scoring and curve fitting of Arabidopsis seed  
623 germination. *The Plant Journal* **62**: 148-159
- 624 **Joseph B, Corwin JA, Li B, Atwell S, Kliebenstein DJ** (2013) Cytoplasmic genetic variation and  
625 extensive cytonuclear interactions influence natural variation in the metabolome. *eLife* **2**:  
626 e00776
- 627 **Joseph B, Corwin JA, Li B, Atwell S, Kliebenstein DJ** (2013) Cytoplasmic genetic variation and  
628 extensive cytonuclear interactions influence natural variation in the metabolome, Vol 2
- 629 **Joseph B, Corwin JA, Züst T, Li B, Iravani M, Schaepman-Strub G, Turnbull LA, Kliebenstein DJ** (2013)  
630 Hierarchical Nuclear and Cytoplasmic Genetic Architectures for Plant Growth and Defense  
631 within Arabidopsis. *The Plant Cell Online* **25**: 1929-1945
- 632 **Karimi-Ashtiyani R, Ishii T, Niessen M, Stein N, Heckmann S, Gurushidze M, Banaei-Moghaddam**  
633 **AM, Fuchs J, Schubert V, Koch K, Weiss O, Demidov D, Schmidt K, Kumlehn J, Houben A**  
634 (2015) Point mutation impairs centromeric CENH3 loading and induces haploid plants. **112**:  
635 11211-11216
- 636 **Kermicle JL** (1969) Androgenesis Conditioned by a Mutation in Maize. **166**: 1422-1424
- 637 **Kleine T, Leister D** (2016) Retrograde signaling: Organelles go networking. *Biochimica et Biophysica*  
638 *Acta (BBA) - Bioenergetics* **1857**: 1313-1325
- 639 **Kokorian J, Polder G, Keurentjes JJB, Vreugdenhil D, Olortegui Guzman MC** (2010) An ImageJ based  
640 measurement setup for automated phenotyping of plants. *In* A Jahnen, C Moll, eds,  
641 Proceedings of the ImageJ User and Developer Conference, Luxembourg, Luxembourg, 27-29  
642 October 2010. Centre de Recherche Public Henri Tudor, Luxembourg, pp 178-182
- 643 **Kromdijk J, Głowacka K, Leonelli L, Gabilly ST, Iwai M, Niyogi KK, Long SP** (2016) Improving  
644 photosynthesis and crop productivity by accelerating recovery from photoprotection. *Science*  
645 **354**: 857-861
- 646 **Kwak S-Y, Lew TTS, Sweeney CJ, Koman VB, Wong MH, Bohmert-Tatarev K, Snell KD, Seo JS, Chua**  
647 **N-H, Strano MS** (2019) Chloroplast-selective gene delivery and expression in planta using  
648 chitosan-complexed single-walled carbon nanotube carriers. *Nature Nanotechnology* **14**:  
649 447-455
- 650 **Levings CS** (1990) The Texas Cytoplasm of Maize: Cytoplasmic Male Sterility and Disease  
651 Susceptibility. *Science* **250**: 942-947
- 652 **Li H** (2013) Aligning sequence reads, clone sequences and assembly contigs with BWA-MEM. *In* arXiv  
653 e-prints,
- 654 **Li H, Handsaker B, Wysoker A, Fennell T, Ruan J, Homer N, Marth G, Abecasis G, Durbin R,**  
655 **Subgroup GPDP** (2009) The Sequence Alignment/Map format and SAMtools. *Bioinformatics*  
656 **25**: 2078-2079
- 657 **Lisec J, Schauer N, Kopka J, Willmitzer L, Fernie AR** (2006) Gas chromatography mass spectrometry-  
658 based metabolite profiling in plants. *Nat. Protocols* **1**: 387-396
- 659 **Love MI, Huber W, Anders S** (2014) Moderated estimation of fold change and dispersion for RNA-seq  
660 data with DESeq2. *Genome Biology* **15**: 550
- 661 **Martin M** (2011) Cutadapt removes adapter sequences from high-throughput sequencing reads.  
662 2011 **17**: 3 %J EMBnet.journal
- 663 **Miclaus M, Balacescu O, Has I, Balacescu L, Has V, Suteu D, Neuenschwander S, Keller I, Bruggmann**  
664 **R** (2016) Maize Cytolines Unmask Key Nuclear Genes That Are under the Control of  
665 Retrograde Signaling Pathways in Plants. *Genome Biology and Evolution* **8**: 3256-3270
- 666 **Montooth KL, Meiklejohn CD, Abt DN, Rand DM** (2010) MITOCHONDRIAL–NUCLEAR EPISTASIS  
667 AFFECTS FITNESS WITHIN SPECIES BUT DOES NOT CONTRIBUTE TO FIXED INCOMPATIBILITIES  
668 BETWEEN SPECIES OF DROSOPHILA. *Evolution* **64**: 3364-3379

- 669 **Mossman JA, Biancani LM, Zhu C-T, Rand DM** (2016) Mitonuclear Epistasis for Development Time  
670 and Its Modification by Diet in *Drosophila*. **203**: 463-484
- 671 **Mossman JA, Ge JY, Navarro F, Rand DM** (2019) Mitochondrial DNA Fitness Depends on Nuclear  
672 Genetic Background in *Drosophila*. **9**: 1175-1188
- 673 **Murchie EH, Kefauver S, Araus JL, Muller O, Rascher U, Flood PJ, Lawson T** (2018) Measuring the  
674 dynamic photosynthome. *Annals of Botany* **122**: 207-220
- 675 **Peterson R, Slovin JP, Chen CJIJoPB** (2010) A simplified method for differential staining of aborted  
676 and non-aborted pollen grains. **1**: e13-e13
- 677 **Petrillo E, Godoy Herz MA, Fuchs A, Reifer D, Fuller J, Yanovsky MJ, Simpson C, Brown JWS, Barta A,  
678 Kalyna M, Kornblihtt AR** (2014) A Chloroplast Retrograde Signal Regulates Nuclear  
679 Alternative Splicing. *Science* **344**: 427-430
- 680 **Ravi M, Chan SWL** (2010) Haploid plants produced by centromere-mediated genome elimination.  
681 **464**: 615-618
- 682 **Ravi M, Marimuthu MPA, Tan EH, Maheshwari S, Henry IM, Marin-Rodriguez B, Urtecho G, Tan J,  
683 Thornhill K, Zhu F, Panoli A, Sundaresan V, Britt AB, Comai L, Chan SWL** (2014) A haploid  
684 genetics toolbox for *Arabidopsis thaliana*. *Nat Commun* **5**
- 685 **Reimand J, Arak T, Adler P, Kolberg L, Reisberg S, Peterson H, Vilo J** (2016) g:Profiler—a web server  
686 for functional interpretation of gene lists (2016 update). *Nucleic Acids Research* **44**: W83-  
687 W89
- 688 **Roux F, Mary-Huard T, Barillot E, Wenes E, Botran L, Durand S, Villoutreix R, Martin-Magniette M-L,  
689 Camilleri C, Budar F** (2016) Cytonuclear interactions affect adaptive traits of the annual plant  
690 *Arabidopsis thaliana* in the field. *Proceedings of the National Academy of Sciences* **113**: 3687-  
691 3692
- 692 **Ruf S, Forner J, Hasse C, Kroop X, Seeger S, Schollbach L, Schadach A, Bock R** (2019) High-efficiency  
693 generation of fertile transplastomic *Arabidopsis* plants. *Nature Plants* **5**: 282-289
- 694 **Sambatti JBM, Ortiz-Barrientos D, Baack EJ, Rieseberg LH** (2008) Ecological selection maintains  
695 cytonuclear incompatibilities in hybridizing sunflowers. **11**: 1082-1091
- 696 **Schneerman M, Charbonneau M, Weber DJMGCN** (2000) A survey of ig containing materials. 54-55
- 697 **Sloan DB, Wu Z, Sharbrough J** (2018) Correction of Persistent Errors in *Arabidopsis* Reference  
698 Mitochondrial Genomes. **30**: 525-527
- 699 **Somerville CR, Ogren WL** (1980) Photorespiration mutants of *Arabidopsis thaliana* deficient in  
700 serine-glyoxylate aminotransferase activity. *Proceedings of the National Academy of Sciences*  
701 **77**: 2684-2687
- 702 **Sumner LW, Amberg A, Barrett D, Beale MH, Beger R, Daykin CA, Fan TW-M, Fiehn O, Goodacre R,  
703 Griffin JL, Hankemeier T, Hardy N, Harnly J, Higashi R, Kopka J, Lane AN, Lindon JC, Marriott  
704 P, Nicholls AW, Reily MD, Thaden JJ, Viant MR** (2007) Proposed minimum reporting  
705 standards for chemical analysis. *Metabolomics* **3**: 211-221
- 706 **Tang Z, Hu W, Huang J, Lu X, Yang Z, Lei S, Zhang Y, Xu C** (2014) Potential Involvement of Maternal  
707 Cytoplasm in the Regulation of Flowering Time via Interaction with Nuclear Genes in Maize.  
708 *Crop Sci.* **54**: 544-553
- 709 **The 1001 Genomes Consortium** (2016) 1,135 Genomes Reveal the Global Pattern of Polymorphism in  
710 *Arabidopsis thaliana*. *Cell*
- 711 **Trapnell C, Pachter L, Salzberg SL** (2009) TopHat: discovering splice junctions with RNA-Seq.  
712 *Bioinformatics* **25**: 1105-1111
- 713 **Wehrens R, Hageman JA, van Eeuwijk F, Kooke R, Flood PJ, Wijnker E, Keurentjes JJB, Lommen A,  
714 van Eekelen HDLM, Hall RD, Mumm R, de Vos RCH** (2016) Improved batch correction in  
715 untargeted MS-based metabolomics. *Metabolomics* **12**: 88
- 716 **Wijnker E, Deurhof L, van de Belt J, de Snoo CB, Blankestijn H, Becker F, Ravi M, Chan SWL, van Dun  
717 K, Lelivelt CLC, de Jong H, Dirks R, Keurentjes JJB** (2014) Hybrid recreation by reverse  
718 breeding in *Arabidopsis thaliana*. *Nature protocols* **9**: 761-772
- 719 **Wood SN, Pya N, Säfken B** (2016) Smoothing Parameter and Model Selection for General Smooth  
720 Models. *Journal of the American Statistical Association* **111**: 1548-1563

721 **Yin L, Fristedt R, Herdean A, Solymosi K, Bertrand M, Andersson MX, Mamedov F, Vener AV,**  
722 **Schoefs B, Spetea C** (2012) Photosystem II Function and Dynamics in Three Widely Used  
723 *Arabidopsis thaliana* Accessions. PLoS ONE **7**: e46206  
724 **Zeyl C, Andreson B, Weninck E** (2005) NUCLEAR-MITOCHONDRIAL EPISTASIS FOR FITNESS IN  
725 SACCHAROMYCES CEREVISIAE. Evolution **59**: 910-914  
726 **Zhang J, Khan SA, Hasse C, Ruf S, Heckel DG, Bock R** (2015) Full crop protection from an insect pest  
727 by expression of long double-stranded RNAs in plastids. Science **347**: 991-994  
728  
729

730 **Acknowledgements:** Hetty Blankestijn, Jose van de Belt, Daniel Oberste-Lehn, Elio Schijlen, Corrie  
731 Hanhart, and Joris ter Riele (all Wageningen University & Research) are acknowledged for help with  
732 experiments, Jonas Klasen (Max Planck Institute for Plant Breeding Research) for statistical advice, and  
733 Duur Aanen (Wageningen University & Research) for helpful discussions.

734

735 **Author contributions:** P.J.F. and E.W. conceived and designed the study. T.P.J.M.T. designed and  
736 performed the statistical analysis with help from P.J.F., W.K. and F.v.E.. P.J.F., T.P.J.M.T., E.K.,  
737 F.F.M.B., L.W., V.C.B., J.v.A., J.M.G., and L.S. performed experiments. P.J.F., T.P.J.M.T., K.S., P.K.,  
738 E.S., J.A.H., S.K.S., R.W., W.L., R.M., F.v.E. and E.W. analysed data. D.M.K., J.J.B.K., M.K., J.H. and  
739 M.G.M.A. contributed to the interpretation of results. P.J.F., T.P.J.M.T. and E.W. wrote the paper with  
740 significant contributions from M.K., J.H. and M.G.M.A. All authors read and approved the final  
741 manuscript.

742

743 **Competing interests statement:** The authors declare no competing interests

744

745 **Data availability:** Sequencing and transcriptome data will be available in the European Nucleotide  
746 Archive with the primary accession code PRJEB29654. The raw datasets will be made available through  
747 Dryad, a reporting summary will be provided. The analysed datasets that support our findings are  
748 available as supplementary datasets. The associated raw data for Fig. 2 and 3 are provided in  
749 Supplementary Data 1, the raw data for Table 1 is provided in Supplementary Data 2. The germplasm  
750 generated in this project will be available via NASC.
